# Supplementary material for: Comparably Characterizing the Gut Microbial Communities of Amphipods from Littoral to Hadal Zones
Source: MDPI journal article supplement (doi:10.3390/jmse11112197), 2023-11-18
Supplement: s1 [file s1]

Archive with 2 entries (2 files):
- supinfo-figure.pdf
- supinfo-table.xlsx
