# Supplementary material for: Comparably Characterizing the Gut Microbial Communities of Amphipods from Littoral to Hadal Zones
Source: MDPI journal article supplement (doi:10.3390/jmse11112197), 2023-11-18
Supplement: s1 [file s1 › supinfo-table.xlsx]

## Sheet: coverpage
Supplemental Information for:
Comparably characterizing the gut microbial communities of amphipods from littoral to hadal zones
		Table of Contents:
		Table S1	Sheet "Table S1"
		Table S2	Sheet "Table S2"

## Sheet: TableS1
Table S1. Metadata corresponding to the amphipod and environmental samples used in this study
Sample	Depth	Habitat1	Diet2	Site	Host species	Host family	Bioproject NO.	References
Ampit1	1.3	I	H	China: Sanya	Ampithoe sp.	Ampithoidae	PRJNA717782	This study
Ampit2	1	I	H	China: Sanya	Ampithoe sp.	Ampithoidae
Ampit3	0.6	I	H	China: Sanya	Ampithoe sp.	Ampithoidae
Ischy1	2	I	H	China: Qingdao	Ischyroceridae sp.	Ischyroceridae
Ischy2	2	I	H	China: Qingdao	Ischyroceridae sp.	Ischyroceridae
Ischy3	2	I	H	China: Qingdao	Ischyroceridae sp.	Ischyroceridae
Hya1	0.3	I	H	China: Qingdao	Hyalidae sp.	Hyalidae
Hya2	0.3	I	H	China: Qingdao	Hyalidae sp.	Hyalidae
Hya3	0.3	I	H	China: Qingdao	Hyalidae sp.	Hyalidae
Hya4	0.3	I	H	China: Qingdao	Hyalidae sp.	Hyalidae
Hya5	0.3	I	H	China: Qingdao	Hyalidae sp.	Hyalidae
Hya6	0.3	I	H	China: Qingdao	Hyalidae sp.	Hyalidae
Hya7	0.3	I	H	China: Qingdao	Hyalidae sp.	Hyalidae
Hya8	0.3	I	H	China: Qingdao	Hyalidae sp.	Hyalidae
Hya9	0.3	I	H	China: Qingdao	Hyalidae sp.	Hyalidae
Ampe2	5	Sub	D	China: Xiamen	Ampeliscidae sp.	Ampeliscidae
Ampe5	5	Sub	D	China: Xiamen	Ampeliscidae sp.	Ampeliscidae
Ampe4	5.7	Sub	D	China: Xiamen	Ampeliscidae sp.	Ampeliscidae
Ampe10	7.3	Sub	D	China: Xiamen	Ampeliscidae sp.	Ampeliscidae
Ampe11	7.3	Sub	D	China: Xiamen	Ampeliscidae sp.	Ampeliscidae
Ampe8	7.5	Sub	D	China: Xiamen	Ampeliscidae sp.	Ampeliscidae
Ampe1	7.7	Sub	D	China: Xiamen	Ampeliscidae sp.	Ampeliscidae
Ampe7	7.7	Sub	D	China: Xiamen	Ampeliscidae sp.	Ampeliscidae
Ampe6	8.2	Sub	D	China: Xiamen	Ampeliscidae sp.	Ampeliscidae
Ampe9	8.8	Sub	D	China: Xiamen	Ampeliscidae sp.	Ampeliscidae
Emag1	1000	B	S	South China Sea	Eurythenes magellanicus	Eurytheneidae
Emag2	1000	B	S	South China Sea	Eurythenes magellanicus	Eurytheneidae
Emag3	1000	B	S	South China Sea	Eurythenes magellanicus	Eurytheneidae
Emag4	1000	B	S	South China Sea	Eurythenes magellanicus	Eurytheneidae
Emag5	1000	B	S	South China Sea	Eurythenes magellanicus	Eurytheneidae
Eusp1	1226	B	S	South China Sea	Eurythenes sp.	Eurytheneidae
Eusp2	1226	B	S	South China Sea	Eurythenes sp.	Eurytheneidae
Eusp3	1226	B	S	South China Sea	Eurythenes sp.	Eurytheneidae
Eusp4	1226	B	S	South China Sea	Eurythenes sp.	Eurytheneidae
Ad7	2091	B	S	South China Sea	Abyssorchomene distinctus	Uristidae
Ad9	2091	B	S	South China Sea	Abyssorchomene distinctus	Uristidae
Ad10	2802	B	S	South China Sea	Abyssorchomene distinctus	Uristidae
Ag1	6957	H	S	Mariana Trench	Alicella gigantea	Alicellidae
Ag2	6957	H	S	Mariana Trench	Alicella gigantea	Alicellidae
Ag3	6957	H	S	Mariana Trench	Alicella gigantea	Alicellidae
Ag4	6957	H	S	Mariana Trench	Alicella gigantea	Alicellidae
Ag5	7125	H	S	Mariana Trench	Alicella gigantea	Alicellidae
Ag6	7125	H	S	Mariana Trench	Alicella gigantea	Alicellidae
Ag7	7125	H	S	Mariana Trench	Alicella gigantea	Alicellidae
Prin1	8226	H	S	Mariana Trench	Princaxelia sp.	Pardaliscidae
Prin2	8226	H	S	Mariana Trench	Princaxelia sp.	Pardaliscidae
Prin3	8226	H	S	Mariana Trench	Princaxelia sp.	Pardaliscidae
Prin4	8226	H	S	Mariana Trench	Princaxelia sp.	Pardaliscidae
Hg1	10109	H	S	Mariana Trench	Hirondellea gigas	Hirondelleidae	PRJNA513912	Cheng, Wang, Li, Yan & He, 2019
Hg2	10109	H	S	Mariana Trench	Hirondellea gigas	Hirondelleidae
Hg3	10109	H	S	Mariana Trench	Hirondellea gigas	Hirondelleidae
Hg4	10109	H	S	Mariana Trench	Hirondellea gigas	Hirondelleidae
Hg5	10109	H	S	Mariana Trench	Hirondellea gigas	Hirondelleidae
Hg6	10109	H	S	Mariana Trench	Hirondellea gigas	Hirondelleidae
Hg7	10109	H	S	Mariana Trench	Hirondellea gigas	Hirondelleidae
Hg8	10109	H	S	Mariana Trench	Hirondellea gigas	Hirondelleidae
Halice1	10910	H	S	Mariana Trench	Halice sp. MT-2017	Pardaliscidae
Halice2	10910	H	S	Mariana Trench	Halice sp. MT-2017	Pardaliscidae
Halice3	10910	H	S	Mariana Trench	Halice sp. MT-2017	Pardaliscidae
Halice4	10910	H	S	Mariana Trench	Halice sp. MT-2017	Pardaliscidae
Halice5	10910	H	S	Mariana Trench	Halice sp. MT-2017	Pardaliscidae
Omon1	0	Sup	D	Italy: Maimoni	Orchestia montagui	Talitridae	PRJNA260027	Abdelrhman et al., 2017
Omon2	0	Sup	D	Italy: S. Giovanni di Sinis	Orchestia montagui	Talitridae
Ostep1	0	Sup	D	Italy: S. Giovanni di Sinis	Orchestia stephenseni	Talitridae
Ostep2	0	Sup	D	Italy: Piscadeddus	Orchestia stephenseni	Talitridae
Spel1	0	Sup	D	Italy: Centro 1° Sassu	Sardorchestia pelecaniformis	Talitridae
Spel2	0	Sup	D	Italy: Sa Rocca Tunda	Sardorchestia pelecaniformis	Talitridae
Spel3	0	Sup	D	Italy: Centro 1° Sassu	Sardorchestia pelecaniformis	Talitridae
Tsal1	0	Sup	D	Italy: Giorgino	Talitrus saltator	Talitridae
Tsal2	0	Sup	D	Italy: Giorgino	Talitrus saltator	Talitridae
Tsal3	0	Sup	D	Italy: Giorgino	Talitrus saltator	Talitridae
Tugo1	0	Sup	D	Italy: Is arenas	Talorchestia ugolinii	Talitridae
Tugo2	0	Sup	D	Italy: Is arenas	Talorchestia ugolinii	Talitridae
W10500-1	10500	H	N/A	Mariana Trench	Environment	Seawater	PRJNA413447	Liu J et al., 2019
W10500-2	10500	H	N/A	Mariana Trench	Environment	Seawater
W10400-1	10400	H	N/A	Mariana Trench	Environment	Seawater
W10400-2	10400	H	N/A	Mariana Trench	Environment	Seawater
W10400-4	10400	H	N/A	Mariana Trench	Environment	Seawater
W10500-3	10500	H	N/A	Mariana Trench	Environment	Seawater
W10500-4	10500	H	N/A	Mariana Trench	Environment	Seawater
W10400-5	10400	H	N/A	Mariana Trench	Environment	Seawater
W10400-6	10400	H	N/A	Mariana Trench	Environment	Seawater
W9600-1	9600	H	N/A	Mariana Trench	Environment	Seawater
W9600-2	9600	H	N/A	Mariana Trench	Environment	Seawater
W4000-1	4000	H	N/A	Mariana Trench	Environment	Seawater
W4000-2	4000	H	N/A	Mariana Trench	Environment	Seawater
W4000-3	4000	H	N/A	Mariana Trench	Environment	Seawater
W4000-4	4000	H	N/A	Mariana Trench	Environment	Seawater
W9600-3	9600	H	N/A	Mariana Trench	Environment	Seawater
W4000-5	4000	H	N/A	Mariana Trench	Environment	Seawater
W9600-6	9600	H	N/A	Mariana Trench	Environment	Seawater
3KL	3000	B	N/A	Mariana Trench	Environment	Seawater	PRJNA412129	Liu H, 2018
3KS	3000	B	N/A	Mariana Trench	Environment	Seawater
5KL	5000	B	N/A	Mariana Trench	Environment	Seawater
5KS	5000	B	N/A	Mariana Trench	Environment	Seawater
7KL	7000	H	N/A	Mariana Trench	Environment	Seawater
7KS	7000	H	N/A	Mariana Trench	Environment	Seawater
SRR5757138	800	Sub	N/A	South China Sea	Environment	Seawater
SRR5757139	2900	B	N/A	South China Sea	Environment	Seawater	PRJNA389159	Li Yi, 2017
SRR5757140	200	Sub	N/A	South China Sea	Environment	Seawater
SRR5757145	1	I	N/A	South China Sea	Environment	Seawater
SRR5757146	200	Sub	N/A	South China Sea	Environment	Seawater
SRR5757147	2900	B	N/A	South China Sea	Environment	Seawater
SRR5757148	800	Sub	N/A	South China Sea	Environment	Seawater
SRR5757149	1	I	N/A	South China Sea	Environment	Seawater
SRR5757154	1	I	N/A	South China Sea	Environment	Seawater
SRR5757155	200	Sub	N/A	South China Sea	Environment	Seawater
SRR5757156	800	Sub	N/A	South China Sea	Environment	Seawater
SRR5757157	2900	B	N/A	South China Sea	Environment	Seawater
SRR5757158	1	I	N/A	South China Sea	Environment	Seawater
SRR5757159	200	Sub	N/A	South China Sea	Environment	Seawater
SRR5757160	2900	B	N/A	South China Sea	Environment	Seawater
SRR5757161	800	Sub	N/A	South China Sea	Environment	Seawater
SRR11095128	1118	B	N/A	South China Sea	Environment	Seawater	PRJNA606380	Sun Q, 2020
SRR11095139	1118	B	N/A	South China Sea	Environment	Seawater
SRR11095150	1120	B	N/A	South China Sea	Environment	Seawater
SRR11095161	1120	B	N/A	South China Sea	Environment	Seawater
SRR11095162	1120	B	N/A	South China Sea	Environment	Seawater
1 Habitat describes the marine zonation where amphipod was captured. Sup, supralittoral; I, intertidal; Sub, subtidal; B, bathypelagic; H, hadopelagic.
2 Diet was referred to as H, herbivore; D, detritivore and S, scavenger.

## Sheet: TbleS2
Tables S2. Alpha index of all amphipod datasets used in this study
Sample	ASV counts	Simpson	Pielou	Faith's PD
KA10	403	0.901916	0.578436	40.1378
KA5	341	0.94803	0.669775	32.3371
KA3	332	0.846526	0.601582	30.6106
KA12	318	0.851735	0.565782	30.7575
KA6	288	0.886544	0.557684	32.7013
KA9	281	0.939963	0.652582	23.0382
XM7	272	0.972207	0.814731	22.2848
AD7	253	0.975033	0.805483	20.127
KA11	251	0.689526	0.441869	22.8343
KA13	248	0.788863	0.460548	23.3389
XM10	246	0.963371	0.789096	21.4937
Hya1	239	0.967438	0.767687	23.4511
XM5	236	0.939689	0.705371	22.1012
Hya5	224	0.937833	0.701971	21.4419
Hya4	216	0.962062	0.74022	21.1561
Hya7	214	0.957234	0.739665	20.2988
Hya6	212	0.976095	0.816063	20.1393
Hya9	193	0.939381	0.731966	20.0589
Hya8	189	0.881589	0.634349	19.128
AD10	181	0.961003	0.785701	16.7891
Ischy1	180	0.920438	0.698865	18.6856
Hya3	171	0.810023	0.576107	17.5181
Hya2	170	0.957387	0.762667	17.3832
XM6	162	0.927725	0.692847	15.9818
Ischy3	157	0.92899	0.708845	16.042
Ischy2	152	0.940384	0.732882	15.326
Eusp1	150	0.93462	0.690777	17.2852
XM12.1	147	0.909361	0.673989	17.1515
Eusp2	144	0.911875	0.648412	17.4976
XM2	143	0.902014	0.635249	17.2996
Prin4	137	0.950312	0.734908	12.7864
KA14	126	0.205412	0.142592	16.4724
KA8	122	0.0827788	0.0724201	16.0433
SYB	112	0.947724	0.779364	8.93544
AD9	111	0.939747	0.760712	11.3727
XM4	110	0.908195	0.68865	13.2457
XM1	110	0.889092	0.618894	13.1944
Eusp3	108	0.927658	0.696066	13.1543
XM12.2	97	0.838251	0.586786	12.7461
SYA	90	0.802232	0.570903	5.88084
SYC	88	0.818677	0.591802	7.02457
Eusp4	80	0.899647	0.67403	11.1907
KA4	78	0.700402	0.367405	12.2924
Prin1	75	0.813717	0.545263	8.52299
AG3	75	0.460845	0.229985	9.96391
Prin3	70	0.954092	0.808761	8.86973
Emag3	70	0.890346	0.689254	8.84121
Emag1	65	0.788004	0.592208	9.32087
KA2	65	0.366692	0.223962	13.0224
Prin2	61	0.890265	0.686852	7.78419
XM9	58	0.848914	0.607144	8.70892
Halice2	43	0.842114	0.657217	7.36593
Emag4	41	0.76103	0.536991	6.6443
AG1	41	0.034887	0.0365317	7.1789
Halice4	40	0.742739	0.491063	7.03622
AG4	37	0.0344253	0.0390214	6.89318
Halice1	33	0.565108	0.429178	5.50914
AG6	33	0.444003	0.250414	5.88178
Hgigas7	28	0.527922	0.306258	5.00737
Emag6	26	0.307101	0.230549	4.35162
Halice5	25	0.632721	0.406485	4.72123
Halice3	24	0.473144	0.331949	4.24455
Hgigas3	23	0.48393	0.312183	4.16734
Emag5	22	0.058166	0.0636286	4.5047
AG7	21	0.568572	0.334771	3.73527
Hgigas5	20	0.510194	0.334638	3.85226
Hgigas1	17	0.384841	0.274942	3.786
Hgigas9	16	0.439547	0.24714	3.03044
AG5	15	0.497642	0.262921	4.09844
Hgigas4	13	0.38493	0.293605	3.44969
Hgigas6	8	0.463769	0.337163	2.30508
Hgigas8	4	0.436689	0.491401	1.21485
AG2	4	0.00461736	0.0133797	1.65675

## Sheet: TableS3
Table S3. Post-hoc Dunn tests assessing alpha diversity across habitats.
ASV counts
group1	group2	statistic	p	p.adj	p.adj.signif
Bathypelagic	Hadopelagic	-2.59245	0.00953	0.059619	ns
Bathypelagic	Intertidal	1.94017	0.052359	0.261794	ns
Bathypelagic	Subtidal	1.33136	0.18307	0.732278	ns
Bathypelagic	Supralittoral	2.63085	0.008517	0.059619	ns
Hadopelagic	Intertidal	5.06773	4.03e-07	3.62e-06	****
Hadopelagic	Subtidal	3.73364	0.000189	0.00151	**
Hadopelagic	Supralittoral	5.6303	1.8e-08	1.8e-07	****
Intertidal	Subtidal	-0.32833	0.742659	0.920706	ns
Intertidal	Supralittoral	0.832992	0.404849	0.920706	ns
Subtidal	Supralittoral	1.02174	0.306902	0.920706	ns
Simpson
Supralittoral	Subtidal	-2.06759	0.0386782	0.232069	ns
Supralittoral	Intertidal	-2.74825	0.00599149	0.0419404	*
Subtidal	Intertidal	-0.438705	0.660875	0.660875	ns
Supralittoral	Hadopelagic	1.36641	0.171809	0.687237	ns
Subtidal	Hadopelagic	3.6356	0.000277332	0.00249599	**
Intertidal	Hadopelagic	4.70162	2.58109e-06	2.58109e-05	****
Supralittoral	Bathypelagic	-1.22183	0.221771	0.665314	ns
Subtidal	Bathypelagic	0.902623	0.366726	0.733452	ns
Intertidal	Bathypelagic	1.46032	0.144201	0.721006	ns
Hadopelagic	Bathypelagic	-2.77726	0.00548187	0.043855	ns
Pielou's Evenness
group1	group2	statistic	p	p.adj	p.adj.signif
Bathypelagic	Hadopelagic	-2.84924	0.004382	0.030676	*
Bathypelagic	Intertidal	1.35106	0.176678	0.70671	ns
Bathypelagic	Subtidal	0.897843	0.369269	1	ns
Bathypelagic	Supralittoral	-2.01753	0.04364	0.218202	ns
Hadopelagic	Intertidal	4.65036	3.31e-06	3.31e-05	****
Hadopelagic	Subtidal	3.47134	0.000518	0.004551	**
Hadopelagic	Supralittoral	0.519601	0.603341	1	ns
Intertidal	Subtidal	-0.25915	0.795521	1	ns
Intertidal	Supralittoral	-3.47772	0.000506	0.004551	**
Subtidal	Supralittoral	-2.70238	0.006885	0.041308	*
Faith'PD
group1	group2	statistic	p	p.adj	p.adj.signif
Bathypelagic	Hadopelagic	-2.5923	0.009534	0.057202	ns
Bathypelagic	Intertidal	1.65129	0.098679	0.493396	ns
Bathypelagic	Subtidal	1.41974	0.155683	0.622731	ns
Bathypelagic	Supralittoral	2.87795	0.004003	0.028019	*
Hadopelagic	Intertidal	4.72764	2.27e-06	2.04e-05	****
Hadopelagic	Subtidal	3.83232	0.000127	0.001016	**
Hadopelagic	Supralittoral	5.91546	3.31e-09	3.31e-08	****
Intertidal	Subtidal	0.019367	0.984548	0.984548	ns
Intertidal	Supralittoral	1.38233	0.16687	0.622731	ns
Subtidal	Supralittoral	1.15437	0.248348	0.622731	ns
